# Supplementary material for: Establishment of an Endocytosis-Related Prognostic Signature for Patients With Low-Grade Glioma
Source: Front Genet. 2021 Sep 6;12:709666. doi: 10.3389/fgene.2021.709666 (PMC8450508; doi:10.3389/fgene.2021.709666)
Supplement: Supplementary Table 1 — The list of endocytosis-related genes (ERGs). [file Table_1.XLSX]

## Sheet: Sheet1
Gene Symbol	Description
EEA1	Early Endosome Antigen 1
NPC1	NPC Intracellular Cholesterol Transporter 1
HGS	Hepatocyte Growth Factor-Regulated Tyrosine Kinase Substrate
RAB7A	RAB7A, Member RAS Oncogene Family
RAB5A	RAB5A, Member RAS Oncogene Family
NPC2	NPC Intracellular Cholesterol Transporter 2
VPS35	VPS35 Retromer Complex Component
SNX1	Sorting Nexin 1
MCOLN1	Mucolipin 1
VAC14	VAC14 Component Of PIKFYVE Complex
TSG101	Tumor Susceptibility 101
PIKFYVE	Phosphoinositide Kinase, FYVE-Type Zinc Finger Containing
CHMP4B	Charged Multivesicular Body Protein 4B
VPS29	VPS29 Retromer Complex Component
CHMP3	Charged Multivesicular Body Protein 3
VPS26A	VPS26, Retromer Complex Component A
CHMP6	Charged Multivesicular Body Protein 6
VPS16	VPS16 Core Subunit Of CORVET And HOPS Complexes
VPS11	VPS11 Core Subunit Of CORVET And HOPS Complexes
VPS4A	Vacuolar Protein Sorting 4 Homolog A
LAMP1	Lysosomal Associated Membrane Protein 1
VPS35L	VPS35 Endosomal Protein Sorting Factor Like
LAMTOR1	Late Endosomal/Lysosomal Adaptor, MAPK And MTOR Activator 1
CHMP2B	Charged Multivesicular Body Protein 2B
SNF8	SNF8 Subunit Of ESCRT-II
USP8	Ubiquitin Specific Peptidase 8
VPS33A	VPS33A Core Subunit Of CORVET And HOPS Complexes
WASHC1	WASH Complex Subunit 1
VPS25	Vacuolar Protein Sorting 25 Homolog
VPS18	VPS18 Core Subunit Of CORVET And HOPS Complexes
VPS4B	Vacuolar Protein Sorting 4 Homolog B
VPS33B	VPS33B Late Endosome And Lysosome Associated
VPS36	Vacuolar Protein Sorting 36 Homolog
CHMP5	Charged Multivesicular Body Protein 5
FIG4	FIG4 Phosphoinositide 5-Phosphatase
CHMP4A	Charged Multivesicular Body Protein 4A
CHMP2A	Charged Multivesicular Body Protein 2A
LAMTOR2	Late Endosomal/Lysosomal Adaptor, MAPK And MTOR Activator 2
SNX2	Sorting Nexin 2
LAMTOR3	Late Endosomal/Lysosomal Adaptor, MAPK And MTOR Activator 3
VPS41	VPS41 Subunit Of HOPS Complex
VPS39	VPS39 Subunit Of HOPS Complex
STAM	Signal Transducing Adaptor Molecule
RBSN	Rabenosyn, RAB Effector
ZFYVE16	Zinc Finger FYVE-Type Containing 16
VPS28	VPS28 Subunit Of ESCRT-I
RAB4A	RAB4A, Member RAS Oncogene Family
CHMP4C	Charged Multivesicular Body Protein 4C
NSG1	Neuronal Vesicle Trafficking Associated 1
EGFR	Epidermal Growth Factor Receptor
SNX5	Sorting Nexin 5
STARD3	StAR Related Lipid Transfer Domain Containing 3
SNX27	Sorting Nexin 27
RAB9A	RAB9A, Member RAS Oncogene Family
VPS52	VPS52 Subunit Of GARP Complex
RILP	Rab Interacting Lysosomal Protein
ENTR1	Endosome Associated Trafficking Regulator 1
SORL1	Sortilin Related Receptor 1
CHMP1B	Charged Multivesicular Body Protein 1B
APPL1	Adaptor Protein, Phosphotyrosine Interacting With PH Domain And Leucine Zipper 1
STX7	Syntaxin 7
RABEP1	Rabaptin, RAB GTPase Binding Effector Protein 1
STX8	Syntaxin 8
RAB11A	RAB11A, Member RAS Oncogene Family
SLC9A6	Solute Carrier Family 9 Member A6
STX12	Syntaxin 12
VPS51	VPS51 Subunit Of GARP Complex
DNAJC13	DnaJ Heat Shock Protein Family (Hsp40) Member C13
ARF6	ADP Ribosylation Factor 6
VAMP8	Vesicle Associated Membrane Protein 8
PIK3C3	Phosphatidylinositol 3-Kinase Catalytic Subunit Type 3
MCOLN3	Mucolipin 3
LAMP2	Lysosomal Associated Membrane Protein 2
SLC11A2	Solute Carrier Family 11 Member 2
VTI1B	Vesicle Transport Through Interaction With T-SNAREs 1B
VPS53	VPS53 Subunit Of GARP Complex
M6PR	Mannose-6-Phosphate Receptor, Cation Dependent
WASHC2C	WASH Complex Subunit 2C
VPS8	VPS8 Subunit Of CORVET Complex
RABGEF1	RAB Guanine Nucleotide Exchange Factor 1
VAMP7	Vesicle Associated Membrane Protein 7
TGFBRAP1	Transforming Growth Factor Beta Receptor Associated Protein 1
EHD1	EH Domain Containing 1
SNX6	Sorting Nexin 6
MTMR2	Myotubularin Related Protein 2
APPL2	Adaptor Protein, Phosphotyrosine Interacting With PH Domain And Leucine Zipper 2
WASH3P	WASP Family Homolog 3, Pseudogene
MICALL1	MICAL Like 1
PDCD6IP	Programmed Cell Death 6 Interacting Protein
CHMP1A	Charged Multivesicular Body Protein 1A
RAB22A	RAB22A, Member RAS Oncogene Family
STAM2	Signal Transducing Adaptor Molecule 2
SNX16	Sorting Nexin 16
OCRL	OCRL Inositol Polyphosphate-5-Phosphatase
WDR91	WD Repeat Domain 91
RAB11FIP2	RAB11 Family Interacting Protein 2
VTA1	Vesicle Trafficking 1
CCDC93	Coiled-Coil Domain Containing 93
RHOB	Ras Homolog Family Member B
GRIPAP1	GRIP1 Associated Protein 1
AP1S1	Adaptor Related Protein Complex 1 Subunit Sigma 1
WDR81	WD Repeat Domain 81
KIF13A	Kinesin Family Member 13A
VPS37A	VPS37A Subunit Of ESCRT-I
TOM1	Target Of Myb1 Membrane Trafficking Protein
VPS37C	VPS37C Subunit Of ESCRT-I
STARD3NL	STARD3 N-Terminal Like
LITAF	Lipopolysaccharide Induced TNF Factor
PTPN23	Protein Tyrosine Phosphatase Non-Receptor Type 23
BACE1	Beta-Secretase 1
SNX3	Sorting Nexin 3
GGA1	Golgi Associated, Gamma Adaptin Ear Containing, ARF Binding Protein 1
ANKFY1	Ankyrin Repeat And FYVE Domain Containing 1
SNX17	Sorting Nexin 17
GGA3	Golgi Associated, Gamma Adaptin Ear Containing, ARF Binding Protein 3
SQSTM1	Sequestosome 1
ZFYVE9	Zinc Finger FYVE-Type Containing 9
CD63	CD63 Molecule
VPS50	VPS50 Subunit Of EARP/GARPII Complex
RAB14	RAB14, Member RAS Oncogene Family
RUFY1	RUN And FYVE Domain Containing 1
EHD3	EH Domain Containing 3
STAMBP	STAM Binding Protein
SNAP25	Synaptosome Associated Protein 25
CLCN5	Chloride Voltage-Gated Channel 5
WASHC2A	WASH Complex Subunit 2A
PLIN3	Perilipin 3
UNC13D	Unc-13 Homolog D
MAPK1	Mitogen-Activated Protein Kinase 1
MTM1	Myotubularin 1
RAB6A	RAB6A, Member RAS Oncogene Family
CLN3	CLN3 Lysosomal/Endosomal Transmembrane Protein, Battenin
ITCH	Itchy E3 Ubiquitin Protein Ligase
KIF16B	Kinesin Family Member 16B
VPS37B	VPS37B Subunit Of ESCRT-I
WASHC4	WASH Complex Subunit 4
VAMP3	Vesicle Associated Membrane Protein 3
CLCN3	Chloride Voltage-Gated Channel 3
VPS26B	VPS26, Retromer Complex Component B
ANKRD27	Ankyrin Repeat Domain 27
PHETA1	PH Domain Containing Endocytic Trafficking Adaptor 1
DTX3L	Deltex E3 Ubiquitin Ligase 3L
IST1	IST1 Factor Associated With ESCRT-III
CLN5	CLN5 Intracellular Trafficking Protein
RUBCN	Rubicon Autophagy Regulator
AP1G1	Adaptor Related Protein Complex 1 Subunit Gamma 1
EPS15	Epidermal Growth Factor Receptor Pathway Substrate 15
VIPAS39	VPS33B Interacting Protein, Apical-Basolateral Polarity Regulator, Spe-39 Homolog
MON2	MON2 Homolog, Regulator Of Endosome-To-Golgi Trafficking
PIK3R4	Phosphoinositide-3-Kinase Regulatory Subunit 4
WDFY1	WD Repeat And FYVE Domain Containing 1
ARFGEF2	ADP Ribosylation Factor Guanine Nucleotide Exchange Factor 2
CORO1C	Coronin 1C
MCOLN2	Mucolipin 2
RAB21	RAB21, Member RAS Oncogene Family
NEDD4	NEDD4 E3 Ubiquitin Protein Ligase
VTI1A	Vesicle Transport Through Interaction With T-SNAREs 1A
C1orf210	Chromosome 1 Open Reading Frame 210
IGF2R	Insulin Like Growth Factor 2 Receptor
WASHC5	WASH Complex Subunit 5
VPS45	Vacuolar Protein Sorting 45 Homolog
ACAP1	ArfGAP With Coiled-Coil, Ankyrin Repeat And PH Domains 1
RAB9B	RAB9B, Member RAS Oncogene Family
TBC1D5	TBC1 Domain Family Member 5
COMMD1	Copper Metabolism Domain Containing 1
RAB13	RAB13, Member RAS Oncogene Family
RAB27A	RAB27A, Member RAS Oncogene Family
TPCN2	Two Pore Segment Channel 2
RAB11FIP1	RAB11 Family Interacting Protein 1
CLTC	Clathrin Heavy Chain
BECN1	Beclin 1
RAB11FIP3	RAB11 Family Interacting Protein 3
NSF	N-Ethylmaleimide Sensitive Factor, Vesicle Fusing ATPase
GGA2	Golgi Associated, Gamma Adaptin Ear Containing, ARF Binding Protein 2
UVRAG	UV Radiation Resistance Associated
ALS2	Alsin Rho Guanine Nucleotide Exchange Factor ALS2
TRAK1	Trafficking Kinesin Protein 1
MVB12B	Multivesicular Body Subunit 12B
SPAST	Spastin
RAB11FIP4	RAB11 Family Interacting Protein 4
GOLIM4	Golgi Integral Membrane Protein 4
AP1AR	Adaptor Related Protein Complex 1 Associated Regulatory Protein
PDCD6	Programmed Cell Death 6
LAPTM4B	Lysosomal Protein Transmembrane 4 Beta
MTOR	Mechanistic Target Of Rapamycin Kinase
MAPK3	Mitogen-Activated Protein Kinase 3
SNX10	Sorting Nexin 10
SCYL2	SCY1 Like Pseudokinase 2
STX6	Syntaxin 6
SNX8	Sorting Nexin 8
F8A1	Coagulation Factor VIII Associated 1
F8A2	Coagulation Factor VIII Associated 2
F8A3	Coagulation Factor VIII Associated 3
VPS37D	VPS37D Subunit Of ESCRT-I
RAB7B	RAB7B, Member RAS Oncogene Family
RHOD	Ras Homolog Family Member D
RAB11FIP5	RAB11 Family Interacting Protein 5
CLCN7	Chloride Voltage-Gated Channel 7
ARRB2	Arrestin Beta 2
NEDD4L	NEDD4 Like E3 Ubiquitin Protein Ligase
AP1S3	Adaptor Related Protein Complex 1 Subunit Sigma 3
FKBP15	FKBP Prolyl Isomerase 15
CCDC22	Coiled-Coil Domain Containing 22
RAB8A	RAB8A, Member RAS Oncogene Family
LYST	Lysosomal Trafficking Regulator
TMEM175	Transmembrane Protein 175
SPHK1	Sphingosine Kinase 1
WASH2P	WASP Family Homolog 2, Pseudogene
MAGEL2	MAGE Family Member L2
C9orf72	C9orf72-SMCR8 Complex Subunit
UBAP1	Ubiquitin Associated Protein 1
EIPR1	EARP Complex And GARP Complex Interacting Protein 1
RAB5C	RAB5C, Member RAS Oncogene Family
BAIAP3	BAI1 Associated Protein 3
TMCC1	Transmembrane And Coiled-Coil Domain Family 1
VAMP2	Vesicle Associated Membrane Protein 2
ANXA2	Annexin A2
STX16	Syntaxin 16
ARRB1	Arrestin Beta 1
PLEKHF2	Pleckstrin Homology And FYVE Domain Containing 2
SBF2	SET Binding Factor 2
CAV1	Caveolin 1
PI4K2A	Phosphatidylinositol 4-Kinase Type 2 Alpha
RAB35	RAB35, Member RAS Oncogene Family
GCC2	GRIP And Coiled-Coil Domain Containing 2
RAC1	Rac Family Small GTPase 1
AP5B1	Adaptor Related Protein Complex 5 Subunit Beta 1
COPB1	COPI Coat Complex Subunit Beta 1
AP4M1	Adaptor Related Protein Complex 4 Subunit Mu 1
DAB2	DAB Adaptor Protein 2
AP2M1	Adaptor Related Protein Complex 2 Subunit Mu 1
OSBPL1A	Oxysterol Binding Protein Like 1A
SNX20	Sorting Nexin 20
MARCHF2	Membrane Associated Ring-CH-Type Finger 2
ARF1	ADP Ribosylation Factor 1
SNX4	Sorting Nexin 4
RAPGEF2	Rap Guanine Nucleotide Exchange Factor 2
PLD3	Phospholipase D Family Member 3
MVB12A	Multivesicular Body Subunit 12A
WDFY2	WD Repeat And FYVE Domain Containing 2
CLINT1	Clathrin Interactor 1
PLEKHB2	Pleckstrin Homology Domain Containing B2
MGRN1	Mahogunin Ring Finger 1
AP1B1	Adaptor Related Protein Complex 1 Subunit Beta 1
DENND10	DENN Domain Containing 10
EHD4	EH Domain Containing 4
WASH6P	WASP Family Homolog 6, Pseudogene
LRP2	LDL Receptor Related Protein 2
RAB5B	RAB5B, Member RAS Oncogene Family
RAB31	RAB31, Member RAS Oncogene Family
MARCHF3	Membrane Associated Ring-CH-Type Finger 3
PI4K2B	Phosphatidylinositol 4-Kinase Type 2 Beta
TM9SF2	Transmembrane 9 Superfamily Member 2
ZFYVE28	Zinc Finger FYVE-Type Containing 28
CHMP7	Charged Multivesicular Body Protein 7
RAB17	RAB17, Member RAS Oncogene Family
SNX15	Sorting Nexin 15
NSG2	Neuronal Vesicle Trafficking Associated 2
ARRDC3	Arrestin Domain Containing 3
FYCO1	FYVE And Coiled-Coil Domain Autophagy Adaptor 1
RABEP2	Rabaptin, RAB GTPase Binding Effector Protein 2
RAB11B	RAB11B, Member RAS Oncogene Family
LRRK2	Leucine Rich Repeat Kinase 2
PCSK9	Proprotein Convertase Subtilisin/Kexin Type 9
ANK2	Ankyrin 2
LMTK2	Lemur Tyrosine Kinase 2
SNAP29	Synaptosome Associated Protein 29
TFEB	Transcription Factor EB
FGD2	FYVE, RhoGEF And PH Domain Containing 2
TBC1D14	TBC1 Domain Family Member 14
RNF11	Ring Finger Protein 11
TRIM27	Tripartite Motif Containing 27
WASHC3	WASH Complex Subunit 3
YKT6	YKT6 V-SNARE Homolog
ANKRD50	Ankyrin Repeat Domain 50
TOM1L1	Target Of Myb1 Like 1 Membrane Trafficking Protein
SNX18	Sorting Nexin 18
DNM2	Dynamin 2
PLEKHM1	Pleckstrin Homology And RUN Domain Containing M1
SNX13	Sorting Nexin 13
VAMP4	Vesicle Associated Membrane Protein 4
UBXN6	UBX Domain Protein 6
RAB27B	RAB27B, Member RAS Oncogene Family
GRB2	Growth Factor Receptor Bound Protein 2
RAB10	RAB10, Member RAS Oncogene Family
CUL3	Cullin 3
CBL	Cbl Proto-Oncogene
RABGAP1L	RAB GTPase Activating Protein 1 Like
RNF26	Ring Finger Protein 26
PACSIN2	Protein Kinase C And Casein Kinase Substrate In Neurons 2
STX11	Syntaxin 11
MYO5B	Myosin VB
TMEM87B	Transmembrane Protein 87B
LRP1	LDL Receptor Related Protein 1
PLD1	Phospholipase D1
ATP6V0A1	ATPase H+ Transporting V0 Subunit A1
STX10	Syntaxin 10
RAB12	RAB12, Member RAS Oncogene Family
UNC93B1	Unc-93 Homolog B1, TLR Signaling Regulator
ANXA6	Annexin A6
CMTM6	CKLF Like MARVEL Transmembrane Domain Containing 6
RAB29	RAB29, Member RAS Oncogene Family
ABHD6	Abhydrolase Domain Containing 6
RMC1	Regulator Of MON1-CCZ1
MRC1	Mannose Receptor C-Type 1
CTSS	Cathepsin S
RNF126	Ring Finger Protein 126
EPG5	Ectopic P-Granules Autophagy Protein 5 Homolog
ANXA1	Annexin A1
SAMD9L	Sterile Alpha Motif Domain Containing 9 Like
TPCN1	Two Pore Segment Channel 1
SNX11	Sorting Nexin 11
MTMR4	Myotubularin Related Protein 4
TBC1D23	TBC1 Domain Family Member 23
SCAMP3	Secretory Carrier Membrane Protein 3
EHD2	EH Domain Containing 2
TOM1L2	Target Of Myb1 Like 2 Membrane Trafficking Protein
GRIP1	Glutamate Receptor Interacting Protein 1
RFFL	Ring Finger And FYVE Like Domain Containing E3 Ubiquitin Protein Ligase
GAPVD1	GTPase Activating Protein And VPS9 Domains 1
RAP2A	RAP2A, Member Of RAS Oncogene Family
RAB1A	RAB1A, Member RAS Oncogene Family
TOLLIP	Toll Interacting Protein
AGAP1	ArfGAP With GTPase Domain, Ankyrin Repeat And PH Domain 1
TMEM127	Transmembrane Protein 127
USP10	Ubiquitin Specific Peptidase 10
HOOK1	Hook Microtubule Tethering Protein 1
ZFYVE21	Zinc Finger FYVE-Type Containing 21
ALS2CL	ALS2 C-Terminal Like
RAP1A	RAP1A, Member Of RAS Oncogene Family
ATP9A	ATPase Phospholipid Transporting 9A (Putative)
LAMP5	Lysosomal Associated Membrane Protein Family Member 5
SYNJ1	Synaptojanin 1
INPP5F	Inositol Polyphosphate-5-Phosphatase F
PPP1R21	Protein Phosphatase 1 Regulatory Subunit 21
PACS1	Phosphofurin Acidic Cluster Sorting Protein 1
ECE1	Endothelin Converting Enzyme 1
CTSL	Cathepsin L
BLOC1S1	Biogenesis Of Lysosomal Organelles Complex 1 Subunit 1
ITSN1	Intersectin 1
HAP1	Huntingtin Associated Protein 1
OPTN	Optineurin
VCP	Valosin Containing Protein
SNX12	Sorting Nexin 12
SORCS2	Sortilin Related VPS10 Domain Containing Receptor 2
NEGR1	Neuronal Growth Regulator 1
RHOBTB3	Rho Related BTB Domain Containing 3
SAMD9	Sterile Alpha Motif Domain Containing 9
CLIP1	CAP-Gly Domain Containing Linker Protein 1
ARL8B	ADP Ribosylation Factor Like GTPase 8B
MAL2	Mal, T Cell Differentiation Protein 2 (Gene/Pseudogene)
TMEM87A	Transmembrane Protein 87A
OSTM1	Osteoclastogenesis Associated Transmembrane Protein 1
DNM1	Dynamin 1
RAB32	RAB32, Member RAS Oncogene Family
RNF115	Ring Finger Protein 115
DENND1A	DENN Domain Containing 1A
HOOK3	Hook Microtubule Tethering Protein 3
BLOC1S3	Biogenesis Of Lysosomal Organelles Complex 1 Subunit 3
NAPA	NSF Attachment Protein Alpha
AGAP2	ArfGAP With GTPase Domain, Ankyrin Repeat And PH Domain 2
RAB6B	RAB6B, Member RAS Oncogene Family
BIN1	Bridging Integrator 1
GPER1	G Protein-Coupled Estrogen Receptor 1
SNX21	Sorting Nexin Family Member 21
SMAP2	Small ArfGAP2
SNX9	Sorting Nexin 9
USP7	Ubiquitin Specific Peptidase 7
TMEM9	Transmembrane Protein 9
RAB4B	RAB4B, Member RAS Oncogene Family
EHBP1	EH Domain Binding Protein 1
TMEM192	Transmembrane Protein 192
ARL1	ADP Ribosylation Factor Like GTPase 1
SNAPIN	SNAP Associated Protein
ANKRD13A	Ankyrin Repeat Domain 13A
KIF5B	Kinesin Family Member 5B
HPSE	Heparanase
HPS6	HPS6 Biogenesis Of Lysosomal Organelles Complex 2 Subunit 3
MSN	Moesin
NDRG1	N-Myc Downstream Regulated 1
FYN	FYN Proto-Oncogene, Src Family Tyrosine Kinase
SGK1	Serum/Glucocorticoid Regulated Kinase 1
TMEM106B	Transmembrane Protein 106B
UBE2O	Ubiquitin Conjugating Enzyme E2 O
AAK1	AP2 Associated Kinase 1
CTTN	Cortactin
AP5Z1	Adaptor Related Protein Complex 5 Subunit Zeta 1
UNC119	Unc-119 Lipid Binding Chaperone
SEPTIN8	Septin 8
VAPA	VAMP Associated Protein A
MYO6	Myosin VI
ARL4C	ADP Ribosylation Factor Like GTPase 4C
TBC1D12	TBC1 Domain Family Member 12
TUBA1A	Tubulin Alpha 1a
LAPTM4A	Lysosomal Protein Transmembrane 4 Alpha
ALMS1	ALMS1 Centrosome And Basal Body Associated Protein
STX4	Syntaxin 4
RND2	Rho Family GTPase 2
MON1A	MON1 Homolog A, Secretory Trafficking Associated
CORO1A	Coronin 1A
TP53	Tumor Protein P53
RAB34	RAB34, Member RAS Oncogene Family
CTNS	Cystinosin, Lysosomal Cystine Transporter
RAB25	RAB25, Member RAS Oncogene Family
RASGEF1B	RasGEF Domain Family Member 1B
REP15	RAB15 Effector Protein
USP50	Ubiquitin Specific Peptidase 50
SNX25	Sorting Nexin 25
ARF3	ADP Ribosylation Factor 3
DENND3	DENN Domain Containing 3
RIC1	RIC1 Homolog, RAB6A GEF Complex Partner 1
MREG	Melanoregulin
DENND1C	DENN Domain Containing 1C
ARF4	ADP Ribosylation Factor 4
CDC42	Cell Division Cycle 42
FGD5	FYVE, RhoGEF And PH Domain Containing 5
INPP4B	Inositol Polyphosphate-4-Phosphatase Type II B
RAB38	RAB38, Member RAS Oncogene Family
TMBIM1	Transmembrane BAX Inhibitor Motif Containing 1
PAK1	P21 (RAC1) Activated Kinase 1
GIPC1	GIPC PDZ Domain Containing Family Member 1
MYO5A	Myosin VA
RIN3	Ras And Rab Interactor 3
LAMP3	Lysosomal Associated Membrane Protein 3
SCAMP1	Secretory Carrier Membrane Protein 1
PSMA7	Proteasome 20S Subunit Alpha 7
RAB36	RAB36, Member RAS Oncogene Family
ARFGEF1	ADP Ribosylation Factor Guanine Nucleotide Exchange Factor 1
PIK3C2A	Phosphatidylinositol-4-Phosphate 3-Kinase Catalytic Subunit Type 2 Alpha
ATIC	5-Aminoimidazole-4-Carboxamide Ribonucleotide Formyltransferase/IMP Cyclohydrolase
TMF1	TATA Element Modulatory Factor 1
RHOA	Ras Homolog Family Member A
PIP5K1C	Phosphatidylinositol-4-Phosphate 5-Kinase Type 1 Gamma
BMX	BMX Non-Receptor Tyrosine Kinase
BLOC1S2	Biogenesis Of Lysosomal Organelles Complex 1 Subunit 2
TBC1D17	TBC1 Domain Family Member 17
ABCA5	ATP Binding Cassette Subfamily A Member 5
CD82	CD82 Molecule
GIMAP5	GTPase, IMAP Family Member 5
S100A10	S100 Calcium Binding Protein A10
NUMB	NUMB Endocytic Adaptor Protein
MTMR6	Myotubularin Related Protein 6
RGP1	RGP1 Homolog, RAB6A GEF Complex Partner 1
ARPC2	Actin Related Protein 2/3 Complex Subunit 2
PLEKHM2	Pleckstrin Homology And RUN Domain Containing M2
BMP6	Bone Morphogenetic Protein 6
NAPG	NSF Attachment Protein Gamma
RAB15	RAB15, Member RAS Oncogene Family
DYNC1LI2	Dynein Cytoplasmic 1 Light Intermediate Chain 2
ATG16L1	Autophagy Related 16 Like 1
LZTR1	Leucine Zipper Like Transcription Regulator 1
PIK3R1	Phosphoinositide-3-Kinase Regulatory Subunit 1
MON1B	MON1 Homolog B, Secretory Trafficking Associated
PI4KB	Phosphatidylinositol 4-Kinase Beta
RNF112	Ring Finger Protein 112
CLSTN1	Calsyntenin 1
NBR1	NBR1 Autophagy Cargo Receptor
CD2AP	CD2 Associated Protein
SMURF2	SMAD Specific E3 Ubiquitin Protein Ligase 2
ATG14	Autophagy Related 14
PLAA	Phospholipase A2 Activating Protein
DYNC1LI1	Dynein Cytoplasmic 1 Light Intermediate Chain 1
ARL5B	ADP Ribosylation Factor Like GTPase 5B
RIN1	Ras And Rab Interactor 1
YIPF2	Yip1 Domain Family Member 2
CAPZB	Capping Actin Protein Of Muscle Z-Line Subunit Beta
RNF167	Ring Finger Protein 167
ATP13A2	ATPase Cation Transporting 13A2
RRAS	RAS Related
ALG2	ALG2 Alpha-1,3/1,6-Mannosyltransferase
PTEN	Phosphatase And Tensin Homolog
CC2D1B	Coiled-Coil And C2 Domain Containing 1B
HDAC6	Histone Deacetylase 6
COMMD5	COMM Domain Containing 5
IQGAP1	IQ Motif Containing GTPase Activating Protein 1
TBC1D10A	TBC1 Domain Family Member 10A
COMMD9	COMM Domain Containing 9
GOLPH3	Golgi Phosphoprotein 3
COMMD8	COMM Domain Containing 8
RALA	RAS Like Proto-Oncogene A
GBF1	Golgi Brefeldin A Resistant Guanine Nucleotide Exchange Factor 1
PAFAH1B1	Platelet Activating Factor Acetylhydrolase 1b Regulatory Subunit 1
ZDHHC5	Zinc Finger DHHC-Type Palmitoyltransferase 5
UBR4	Ubiquitin Protein Ligase E3 Component N-Recognin 4
MR1	Major Histocompatibility Complex, Class I-Related
AMPH	Amphiphysin
S100A11	S100 Calcium Binding Protein A11
SEC16A	SEC16 Homolog A, Endoplasmic Reticulum Export Factor
VAV2	Vav Guanine Nucleotide Exchange Factor 2
LRRK1	Leucine Rich Repeat Kinase 1
RAB8B	RAB8B, Member RAS Oncogene Family
RAB20	RAB20, Member RAS Oncogene Family
BDNF	Brain Derived Neurotrophic Factor
ATG12	Autophagy Related 12
TSPAN9	Tetraspanin 9
BNIP2	BCL2 Interacting Protein 2
RHEB	Ras Homolog, MTORC1 Binding
GDI1	GDP Dissociation Inhibitor 1
SHOC2	SHOC2 Leucine Rich Repeat Scaffold Protein
GAP43	Growth Associated Protein 43
BBS4	Bardet-Biedl Syndrome 4
BBS1	Bardet-Biedl Syndrome 1
SH3TC2	SH3 Domain And Tetratricopeptide Repeats 2
AP3M2	Adaptor Related Protein Complex 3 Subunit Mu 2
RAB3B	RAB3B, Member RAS Oncogene Family
KIF5A	Kinesin Family Member 5A
GRK5	G Protein-Coupled Receptor Kinase 5
LIMK1	LIM Domain Kinase 1
NRP2	Neuropilin 2
EXOC7	Exocyst Complex Component 7
APLP1	Amyloid Beta Precursor Like Protein 1
FAM91A1	Family with Sequence Similarity 91 Member A1
WDR11	WD Repeat Domain 11
SEPTIN7	Septin 7
EXPH5	Exophilin 5
TBC1D10C	TBC1 Domain Family Member 10C
RANBP2	RAN Binding Protein 2
RAB24	RAB24, Member RAS Oncogene Family
MLKL	Mixed Lineage Kinase Domain Like Pseudokinase
COG6	Component Of Oligomeric Golgi Complex 6
STAR	Steroidogenic Acute Regulatory Protein
STYK1	Serine/Threonine/Tyrosine Kinase 1
NECAP2	NECAP Endocytosis Associated 2
RAB3C	RAB3C, Member RAS Oncogene Family
SCRIB	Scribble Planar Cell Polarity Protein
LRBA	LPS Responsive Beige-Like Anchor Protein
OTULIN	OTU Deubiquitinase With Linear Linkage Specificity
SPOPL	Speckle Type BTB/POZ Protein Like
COMMD10	COMM Domain Containing 10
SORCS1	Sortilin Related VPS10 Domain Containing Receptor 1
ARFGAP1	ADP Ribosylation Factor GTPase Activating Protein 1
WWC1	WW And C2 Domain Containing 1
KIF5C	Kinesin Family Member 5C
ITSN2	Intersectin 2
CLIC3	Chloride Intracellular Channel 3
NEU3	Neuraminidase 3
COMMD3	COMM Domain Containing 3
COMMD4	COMM Domain Containing 4
COMMD6	COMM Domain Containing 6
CCZ1	CCZ1 Homolog, Vacuolar Protein Trafficking And Biogenesis Associated
FMNL2	Formin Like 2
ROR1	Receptor Tyrosine Kinase Like Orphan Receptor 1
GDI2	GDP Dissociation Inhibitor 2
ASAP1	ArfGAP With SH3 Domain, Ankyrin Repeat And PH Domain 1
ARAP2	ArfGAP With RhoGAP Domain, Ankyrin Repeat And PH Domain 2
GRASP	General Receptor For Phosphoinositides 1 Associated Scaffold Protein
SYTL4	Synaptotagmin Like 4
ARPC5	Actin Related Protein 2/3 Complex Subunit 5
FSCN1	Fascin Actin-Bundling Protein 1
SPRED2	Sprouty Related EVH1 Domain Containing 2
FMNL3	Formin Like 3
SLITRK5	SLIT And NTRK Like Family Member 5
PTPRO	Protein Tyrosine Phosphatase Receptor Type O
SEMA4A	Semaphorin 4A
HERC5	HECT And RLD Domain Containing E3 Ubiquitin Protein Ligase 5
KIR3DL2	Killer Cell Immunoglobulin Like Receptor, Three Ig Domains And Long Cytoplasmic Tail 2
TMED7	Transmembrane P24 Trafficking Protein 7
NEURL4	Neuralized E3 Ubiquitin Protein Ligase 4
DERL1	Derlin 1
TBC1D16	TBC1 Domain Family Member 16
APLP2	Amyloid Beta Precursor Like Protein 2
OSBP	Oxysterol Binding Protein
PLK1	Polo Like Kinase 1
LAPTM5	Lysosomal Protein Transmembrane 5
USP32	Ubiquitin Specific Peptidase 32
RNF41	Ring Finger Protein 41
GIT1	GIT ArfGAP 1
WDR72	WD Repeat Domain 72
RAB40C	RAB40C, Member RAS Oncogene Family
WNK4	WNK Lysine Deficient Protein Kinase 4
RAB2A	RAB2A, Member RAS Oncogene Family
ZFYVE26	Zinc Finger FYVE-Type Containing 26
SEC13	SEC13 Homolog, Nuclear Pore And COPII Coat Complex Component
SMAP1	Small ArfGAP 1
FAM171A1	Family With Sequence Similarity 171 Member A1
PDZD8	PDZ Domain Containing 8
BAG6	BAG Cochaperone 6
PLD4	Phospholipase D Family Member 4
AMOT	Angiomotin
MAL	Mal, T Cell Differentiation Protein
ARRDC1	Arrestin Domain Containing 1
MSRA	Methionine Sulfoxide Reductase A
NEDD9	Neural Precursor Cell Expressed, Developmentally Down-Regulated 9
CDK5	Cyclin Dependent Kinase 5
ATG5	Autophagy Related 5
RIN2	Ras And Rab Interactor 2
RAB33B	RAB33B, Member RAS Oncogene Family
WNT3A	Wnt Family Member 3A
SYT3	Synaptotagmin 3
VAMP5	Vesicle Associated Membrane Protein 5
RAB40B	RAB40B, Member RAS Oncogene Family
NDP	Norrin Cystine Knot Growth Factor NDP
ANXA7	Annexin A7
SEC24B	SEC24 Homolog B, COPII Coat Complex Component
EPHA2	EPH Receptor A2
GPI	Glucose-6-Phosphate Isomerase
THSD1	Thrombospondin Type 1 Domain Containing 1
EPS8	Epidermal Growth Factor Receptor Pathway Substrate 8
UBE4B	Ubiquitination Factor E4B
KIF3B	Kinesin Family Member 3B
USP9X	Ubiquitin Specific Peptidase 9 X-Linked
SGMS1	Sphingomyelin Synthase 1
RALB	RAS Like Proto-Oncogene B
ARAP1	ArfGAP With RhoGAP Domain, Ankyrin Repeat And PH Domain 1
TIAM1	TIAM Rac1 Associated GEF 1
PRPF4B	Pre-MRNA Processing Factor 4B
RAP1B	RAP1B, Member Of RAS Oncogene Family
CSTB	Cystatin B
SDC2	Syndecan 2
MINK1	Misshapen Like Kinase 1
MTSS1	MTSS I-BAR Domain Containing 1
TRAFD1	TRAF-Type Zinc Finger Domain Containing 1
CMTM3	CKLF Like MARVEL Transmembrane Domain Containing 3
PKD1	Polycystin 1, Transient Receptor Potential Channel Interacting
CD2	CD2 Molecule
MYO1C	Myosin IC
SEC23A	Sec23 Homolog A, COPII Coat Complex Component
PKP4	Plakophilin 4
CLIC4	Chloride Intracellular Channel 4
USP33	Ubiquitin Specific Peptidase 33
TLR5	Toll Like Receptor 5
ATP6AP2	ATPase H+ Transporting Accessory Protein 2
ARFGAP3	ADP Ribosylation Factor GTPase Activating Protein 3
TBC1D15	TBC1 Domain Family Member 15
ZW10	Zw10 Kinetochore Protein
FPR1	Formyl Peptide Receptor 1
PEPD	Peptidase D
S100A9	S100 Calcium Binding Protein A9
ACP2	Acid Phosphatase 2, Lysosomal
BICD1	BICD Cargo Adaptor 1
SEZ6L2	Seizure Related 6 Homolog Like 2
TBC1D9	TBC1 Domain Family Member 9
LRRC59	Leucine Rich Repeat Containing 59
UNC50	Unc-50 Inner Nuclear Membrane RNA Binding Protein
C11orf24	Chromosome 11 Open Reading Frame 24
PPARG	Peroxisome Proliferator Activated Receptor Gamma
PRMT1	Protein Arginine Methyltransferase 1
RALGDS	Ral Guanine Nucleotide Dissociation Stimulator
FGF21	Fibroblast Growth Factor 21
PPT1	Palmitoyl-Protein Thioesterase 1
RRAD	RRAD, Ras Related Glycolysis Inhibitor And Calcium Channel Regulator
MARCKSL1	MARCKS Like 1
RAB3IP	RAB3A Interacting Protein
SEPTIN6	Septin 6
PLA2G6	Phospholipase A2 Group VI
CD151	CD151 Molecule (Raph Blood Group)
GLO1	Glyoxalase I
TFE3	Transcription Factor Binding To IGHM Enhancer 3
DUOX2	Dual Oxidase 2
LASP1	LIM And SH3 Protein 1
PRICKLE1	Prickle Planar Cell Polarity Protein 1
PARD3	Par-3 Family Cell Polarity Regulator
TANK	TRAF Family Member Associated NFKB Activator
HAX1	HCLS1 Associated Protein X-1
GOPC	Golgi Associated PDZ And Coiled-Coil Motif Containing
ACSL3	Acyl-CoA Synthetase Long Chain Family Member 3
FAM20C	FAM20C Golgi Associated Secretory Pathway Kinase
HIP1R	Huntingtin Interacting Protein 1 Related
KIR3DL1	Killer Cell Immunoglobulin Like Receptor, Three Ig Domains And Long Cytoplasmic Tail 1
USP20	Ubiquitin Specific Peptidase 20
REPS1	RALBP1 Associated Eps Domain Containing 1
PLA2G4E	Phospholipase A2 Group IVE
IP6K1	Inositol Hexakisphosphate Kinase 1
SYTL2	Synaptotagmin Like 2
SPG11	SPG11 Vesicle Trafficking Associated, Spatacsin
COG8	Component Of Oligomeric Golgi Complex 8
GNPTG	N-Acetylglucosamine-1-Phosphate Transferase Subunit Gamma
NUMBL	NUMB Like Endocytic Adaptor Protein
RABIF	RAB Interacting Factor
DYNLRB1	Dynein Light Chain Roadblock-Type 1
TWF1	Twinfilin Actin Binding Protein 1
ARL4A	ADP Ribosylation Factor Like GTPase 4A
SYTL3	Synaptotagmin Like 3
SGSM1	Small G Protein Signaling Modulator 1
DRAM1	DNA Damage Regulated Autophagy Modulator 1
NCKIPSD	NCK Interacting Protein With SH3 Domain
